# Supplementary material for: Giant magnetocrystalline anisotropy of 5d transition metal-based phthalocyanine sheet
Source: Royal Society of Chemistry journal article supplement (doi:10.1039/c5cp01525a), 2015-01-01
Supplement: c5cp01525a1.pdf [file c5cp01525a1.pdf]

## Supporting Information

### Giant Magnetocrystalline Anisotropy of 5*d* Transition Metal-based Phthalocyanine Sheet

Jian Zhou, Qian Wang, Qiang Sun, Yoshiyuki Kawazoe, and Puru Jena

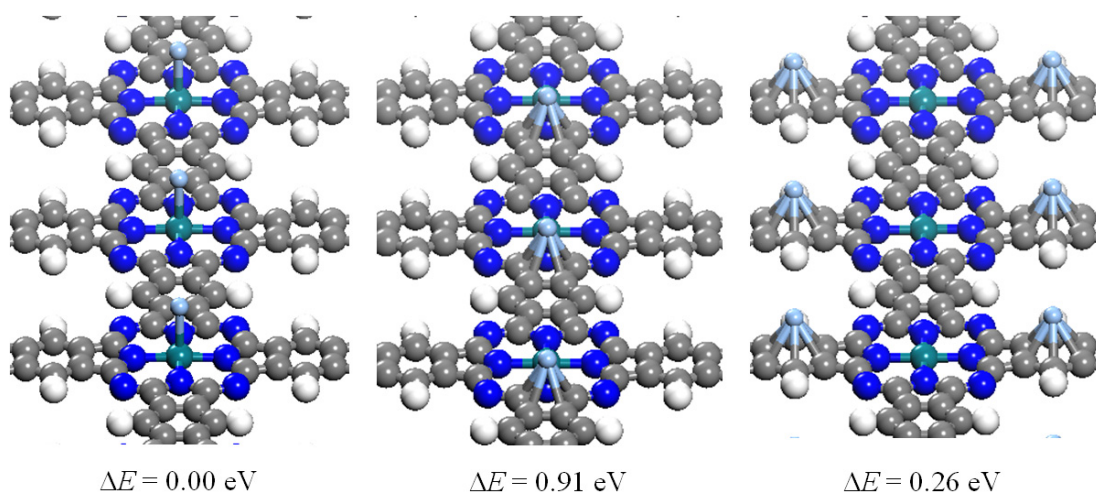

**Figure S1.** Relative energies of the Ir atom adsorbed on Rh (left panel), on pentagon (middle panel), and on hexagon of poly-(Ir,Rh)Pc (right panel).

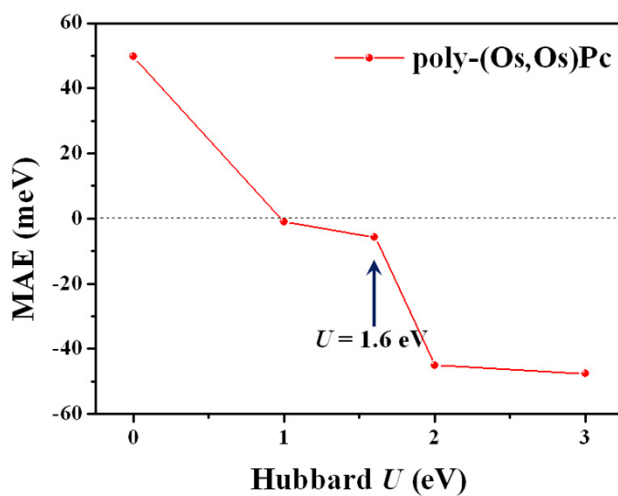

**Figure S2.** Magnetic anisotropy energy of poly-(Os,Os)Pc as a function of Hubbard  $U$  on Os.
